# Supplementary material for: An automated iterative approach for protein structure refinement using pseudocontact shifts
Source: J Biomol NMR. 2021 Aug 2;75(8-9):319–34. doi: 10.1007/s10858-021-00376-8 (PMC8473369; doi:10.1007/s10858-021-00376-8)
Supplement: Supplementary file 2 — (XLS 12 KB) [file 10858_2021_376_MOESM2_ESM.xlsx]

## Sheet: Sheet1
This is a protocol to express dArmRPs single amino acid 15N labelled samples in M9 with E.coli BL21(DE3)
Protocol
0) Insert in the green cell below the final volume of M9 you want to express with.
1) Prepare the M9 medium following the "M9 medium preparation" section below adding reagents in the indicated order. For "AA" use the "Individual amino acid" section, without the amino acid you want to 15N label. Replace the antibiotic following your constructu resistance if needed.
2) Prepare a preculture of 7.5 mL in a 50mL falcon for each flask and incubate at 37˚C O/N
3) Equally divide the remained prepared M9 into the flask, saving 50 mL/L in a separate falcon. Dissolve the 15N version of the selected aa in the saved M9 following quantities in the "Individual amino acid" section.
4) Inoculate the main culture with the preculture and incubate at 37˚C 160rpm until OD 0.6 is reached.
5) Add the saved M9 containing the labelled amino acid to the main culture and IPTG (based on your construct) to induce expression
6) Incubate for a variable time at a variable temperature depending on desired yield and scrambling level. It is suggested to use high temperature (i.e. 30˚C) for short times (i.e. 4h).
7) Pellet and freeze or procede with the standard purification protocol.
Individual amino acid
Amino acid			mg/L	mg		M9 total volume (L)	1
Alanine	Ala	A	500	500
Arginine	Arg	R	400	400
Aspartic acid	Asp	D	400	400
Glutamic acid	Glu	E	650	650
Glycine	Gly	G	550	550
Histidine	His	H	100	100
Isoleucine	Iso	I	230	230
Leucine	Leu	L	230	230
Lysine Hcl	Lys	K	420	420
Methionine	Met	M	250	250
Proline	Pro	P	100	100
Serine	Ser	S	2100	2100
Threonine	Thr	T	230	230
Valine	Val	V	230	230
Phenylalanine	Phe	F	130	130
Tryptophan	Trp	W	50	50
Asparagine	Asn	N	0	0
Cysterine Hcl	Cys	C	50	50
Tyrosine	Tyr	Y	170	170
Glutamine	Gln	Q	400	400
M9 Medium preparation
Na2HPO4	8.5	g	1) Prepare M9 (no selected aa)
KH2PO4	3	g	2) Preculture 7.5mL x2 37˚C O/N
NaCl	0.5	g	3) Save 50 mL/L medium and add selected aa
AA	-		4) Main culture 37˚C 160rpm till OD 0.6
MgSO4 1M	2	mL	5) Add 50mL M9 15N medium
Glucose	2.5	g	6) Add IPTG 1mM
Solution Q	1	mL	7) 30˚C 160rpm 4h
H2O to	1	L	8) Freeze
Amp	1000	uL
