# Supplementary material for: An automated iterative approach for protein structure refinement using pseudocontact shifts
Source: J Biomol NMR. 2021 Aug 2;75(8-9):319–34. doi: 10.1007/s10858-021-00376-8 (PMC8473369; doi:10.1007/s10858-021-00376-8)
Supplement: Supplementary file 3 — (xlsx 10 KB) [file 10858_2021_376_MOESM3_ESM.xlsx]

## Sheet: Sheet1
General note: Quikchange II mutagenesis protocol was applied (see Materials and Methods), so only the forward primer is reported
Legend
Attachment site	Cysteine mutation site. In brackets it is indicated the cap/module target of the mutation, followed by the standard mutation nomenclature with the number referring to the position inside the indicated cap/module.
Codon usage	Internal modules codon usage used to perform targeted mutations with repetitive sequence
Protein	Protein target
Name	Name of the primer
Sequence	Sequence of the primer, 5' to 3'
Attachment site	Codon usage	Protein	Name	Sequence
(A)S21C	-	YMA and YM4A	(A)S21C_fwd	GAA TCT TCT CGT TCT CGT GGC ACT GCA GCT GTT CCA GTT T
(Y)S19C	-	YMA	(Y)S19C_fwd	TAT ACT CAT CAG CGC TCT GCG TAA ACT CTC AC
(M1)S21C	III	YMA	(M1_III)S21C_fwd	ATT TGT TCA TTG GGCGAA CAG AGA AGT TGT ACT AAT GCG
(M3)S21C	II	YM4A	(M3_II)S21C_fwd	TTC GTT AGG TGA AAG CAA TTG GAC GAG GGC TGG
(M1)Q18C	I	YM4A	(M1_I)Q18C_fwd	GGT GCT CTG CCT GCT TTG GTG TGT CTC TTA AGC AGT CCA AAT
